# Supplementary material for: Real world treatment patterns in patients with eosinophilic esophagitis in Japan
Source: PubMed Central journal article supplement — Sci Rep. 2024 Nov 11;14:27490. doi: 10.1038/s41598-024-78868-4 (PMC11555047; doi:10.1038/s41598-024-78868-4), 2024-11-11
Supplement: 41598_2024_78868_MOESM1_ESM.pdf [file 41598_2024_78868_MOESM1_ESM.pdf]

## Supplemental Online Content

### **Real world Treatment Patterns in Patients with Eosinophilic Esophagitis in Japan**

Short Title: Real-world treatment of EoE in Japan

Akinari Sawada, MD, PhD<sup>1</sup>, Yasutaka Ihara, Pharm.D, PhD<sup>2</sup>, Takumi Imai, PhD<sup>2</sup>,  
Fumio Tanaka, MD, PhD<sup>1</sup>, Yasuhiro Fujiwara, MD, PhD<sup>1</sup>

1. Department of Gastroenterology, Osaka Metropolitan University Graduate School of Medicine, Osaka, Japan
2. Department of Medical Statics, Osaka Metropolitan University Graduate School of Medicine, Osaka, Japan

**eTable 1** ICD-10 code lists for medical conditions and medications

**eTable 1–1** ICD-10 codes for excluded conditions

**eTable 1–2** Anatomical Therapeutic Chemical Classification System codes for EoE medication

**eTable 1–3** ICD-10 codes for esophageal foreign body or esophageal stricture

**eTable 2** Detailed regimens of the initial treatment for EoE

**eFigure 1** Treatment patterns of EoE in the sensitivity analysis

**eFigure 2** Study design according to STaRT-RWE

Abbreviations: ICD-10, International Statistical Classification of Diseases and Related Health Problems, Tenth Revision; EoE, eosinophilic esophagitis; STaRT-RWE, structured template for planning and reporting on the implementation of real world evidence studies

**eTable 1** ICD-10 code lists for medical conditions and medications

**eTable 1–1** ICD-10 codes for excluded conditions

| Disease names                                                                              | ICD–10 codes                                                                                                                                                                                                                       |
|--------------------------------------------------------------------------------------------|------------------------------------------------------------------------------------------------------------------------------------------------------------------------------------------------------------------------------------|
| Candidal esophagitis                                                                       | B378                                                                                                                                                                                                                               |
| Achalasia                                                                                  | K220                                                                                                                                                                                                                               |
| Malignant lymphoma / Leukemia                                                              | C810, C811, C819, C820, C823, C824, C829, C830, C833, C835, C837, C838, C840, C844, C845, C846, C851, C859, C880, C884, C900, C903, C910, C911, C915, C919, C920, C921, C924, C925, C927, C929, C943, C950, C951, C959, C962, C966 |
| Complications of transplanted organs and tissue including graft–versus–host disease (GVHD) | T860, T861, T864, T868, T869                                                                                                                                                                                                       |

Abbreviations: ICD–10, International Statistical Classification of Diseases and Related Health Problems, Tenth Revision

**eTable 1–2** Anatomical Therapeutic Chemical Classification System codes for EoE medication

| Medication                       | ATC codes                                             |
|----------------------------------|-------------------------------------------------------|
| PPI                              | A02B2 (Excluding potassium-competitive acid blockers) |
| P-CAB                            | A02B2 (Potassium-competitive acid blockers)           |
| STS                              | R03D1 (Budesonide and fluticasone)                    |
| Oral steroid (prednisolone)      | H02A (Prednisolone)                                   |
| Antihistamines                   | R06A                                                  |
| Leukotriene receptor antagonists | R03J2 (Excluding Zafirlukast)                         |

Abbreviations: ATC, Anatomical Therapeutic Chemical Classification System; EoE, eosinophilic esophagitis; PPI, proton pump inhibitor; P–CAB, potassium ion–competitive acid blockers; STS, swallowed topical steroids

**eTable 1–3** ICD-10 codes for esophageal foreign body or esophageal stricture

| Disease names           | ICD–10 codes |
|-------------------------|--------------|
| Esophageal foreign body | T181         |
| Esophageal stricture    | K222         |

Abbreviations: ICD–10, International Statistical Classification of Diseases and Related Health Problems, Tenth Revision

**eTable2** Detailed regimens of the initial treatment for EoE

| Medication                        | Main analysis | Sensitivity analysis |
|-----------------------------------|---------------|----------------------|
|                                   | (n = 615)     | (n = 346)            |
|                                   | n (%)         | n (%)                |
| PPI/P-CAB                         | 374 (60.8%)   | 249 (72.0%)          |
| Others+PPI/P-CAB                  | 118 (19.2%)   | 47 (13.6%)           |
| Others                            | 60 (9.8%)     | 26 (7.5%)            |
| Oral steroid+PPI/P-CAB            | 14 (2.3%)     | 12 (3.5%)            |
| STS+PPI/P-CAB                     | 13 (2.1%)     | 5 (1.4%)             |
| STS+Others+PPI/P-CAB              | 11 (1.8%)     | 0 (0%)               |
| Oral steroid+Others+PPI/P-CAB     | 11 (1.8%)     | 1 (0.3%)             |
| Oral steroid                      | 4 (0.7%)      | 2 (0.6%)             |
| Oral steroid+Others               | 4 (0.7%)      | 2 (0.6%)             |
| STS+Others                        | 2 (0.3%)      | 1 (0.3%)             |
| STS                               | 2 (0.3%)      | 0 (0%)               |
| STS+Oral steroid+Others+PPI/P-CAB | 1 (0.2%)      | 0 (0%)               |
| STS+Oral steroid+PPI/P-CAB        | 1 (0.2%)      | 1 (0.3%)             |

Abbreviations: EoE, eosinophilic esophagitis; PPI, proton pump inhibitor; P-CAB, potassium ion-competitive acid blockers; STS, swallowed topical steroids.

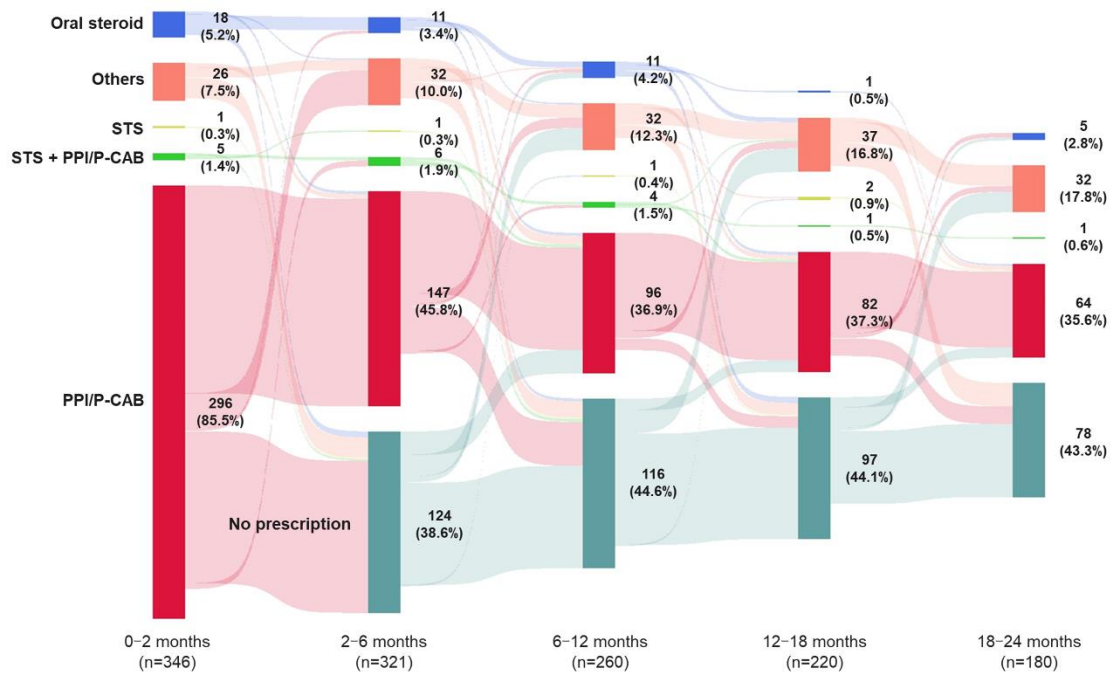

**Figure 1** Treatment patterns of EoE in the sensitivity analysis

Abbreviations: EoE, eosinophilic esophagitis; PPI, proton pump inhibitor; P-CAB, potassium-competitive acid blockers; STS, swallowed topical steroids.

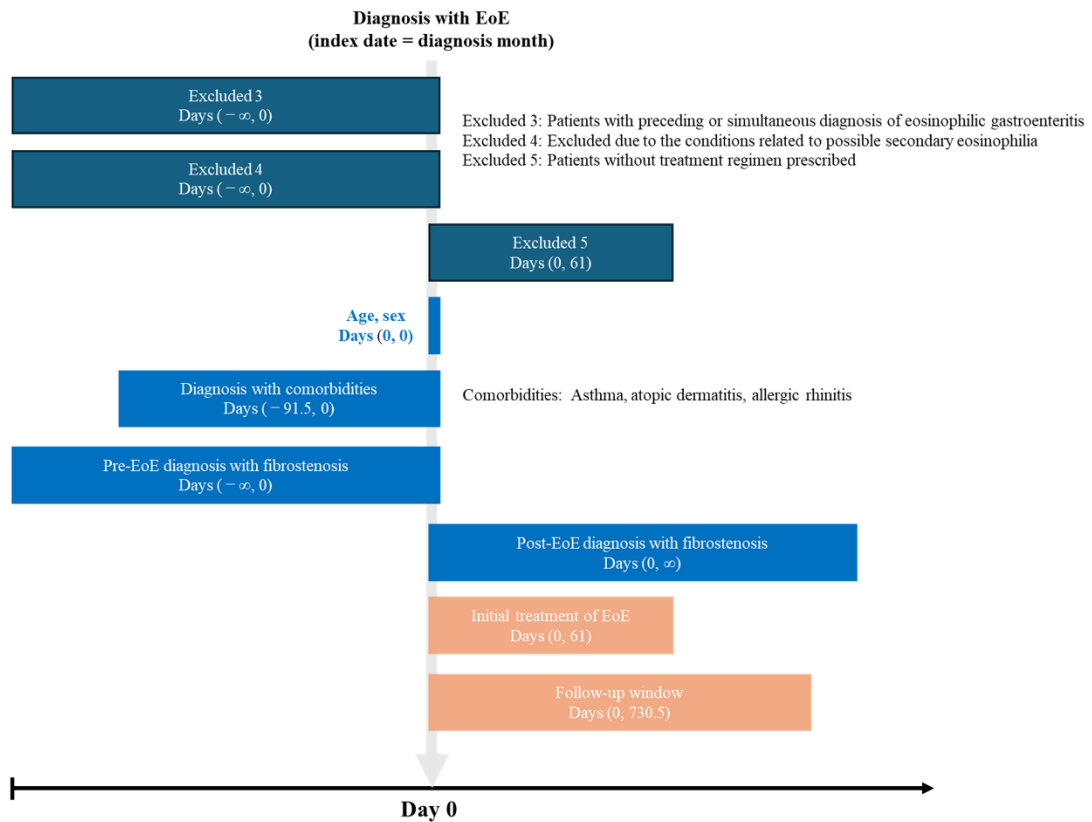

**eFigure 2** Study design according to STaRT-RWE

Abbreviations: EoE, eosinophilic esophagitis; STaRT-RWE, structured template for planning and reporting on the implementation of real world evidence studies
